# Supplementary material for: Isolation and recovery of extracellular vesicles using optically-induced dielectrophoresis on an integrated microfluidic platform
Source: Royal Society of Chemistry journal article supplement (doi:10.1039/d1lc00093d), 2021-01-01
Supplement: d1lc00093d1.pdf [file d1lc00093d1.pdf]

## Supplementary Information

# Isolation and Recovery of Extracellular Vesicles Using Optically-Induced Dielectrophoresis on an Integrated Microfluidic Platform

Yi-Sin Chen<sup>1</sup>, Charles Pin-Kuang Lai<sup>2,3,4</sup>, Chihchen Chen<sup>1,5</sup>, and Gwo-Bin Lee<sup>1,5,6\*</sup>

<sup>1</sup>*Department of Power Mechanical Engineering, National Tsing Hua University, Hsinchu, Taiwan*

<sup>2</sup>*Institute of Atomic and Molecular Sciences, Academia Sinica, Taipei, Taiwan*

<sup>3</sup>*Chemical Biology and Molecular Biophysics Program, Taiwan International Graduate Program, Academia Sinica, Taipei, Taiwan*

<sup>4</sup>*Genome and Systems Biology Degree Program, National Taiwan University and Academia Sinica, Taipei, Taiwan*

<sup>5</sup>*Institute of NanoEngineering and MicroSystems, National Tsing Hua University, Hsinchu, Taiwan*

<sup>6</sup>*Institute of Biomedical Engineering, National Tsing Hua University, Hsinchu, Taiwan*

\*Corresponding author: Gwo-Bin Lee, E-mail: gwobin@pme.nthu.edu.tw; Fax: +886-3-5742495;

Tel: +886-3-5715131 ext. 33765

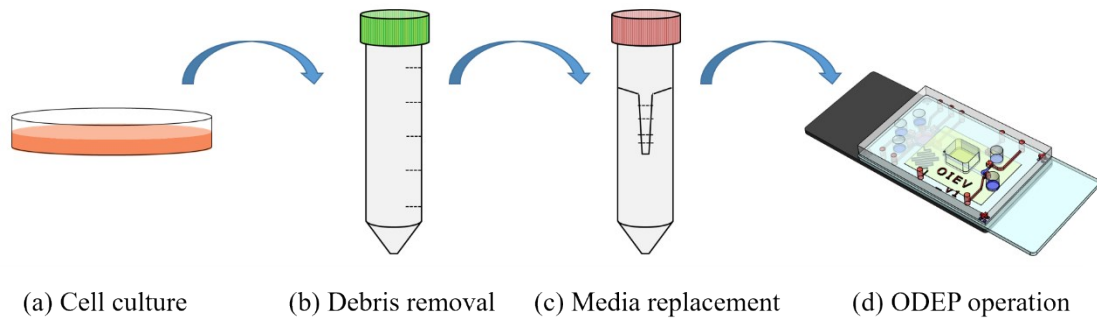

Supplementary Figure 1. On-bench cell-derived EVs preparation for ODEP operation on-chip. (a) PalmGRET cell culture in FBS-free medium for 48 hr. (b) Centrifugation at  $1,000 \times g$  for 20 min and  $3000 \times g$  for 20 min to remove debris. (c) Ultrafiltration at  $3000 \times g$  for 60-75 min at  $8^{\circ}\text{C}$  to replace media with 0.2 M sucrose. (d) EVs isolation and recovery via ODEP on the OIEV chip.

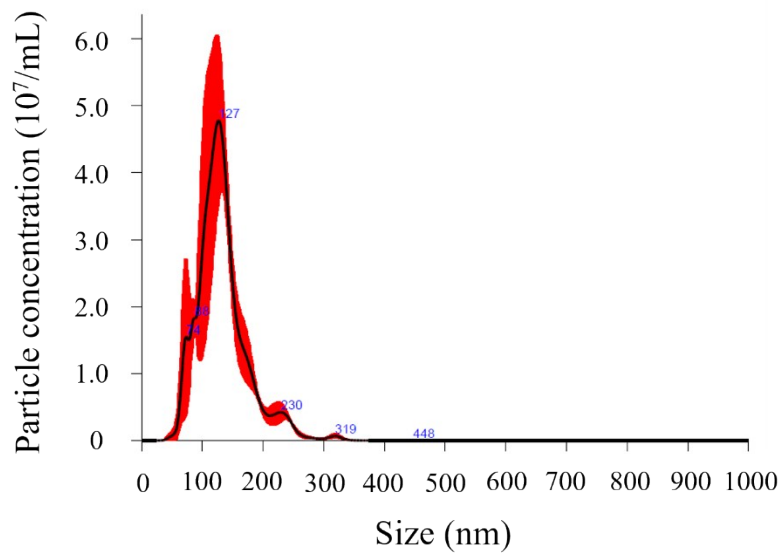

Supplementary Figure 2. EVs, which could be isolated by ODEP force, were recovered and analyzed by NTA. The size distribution ranging from 60 to 250 nm, showed a mode of 127 nm and a mean of 134 nm. Red color represents the standard deviation of three measurements.
